# Supplementary material for: The Human Exonuclease-1 Interactome And Phosphorylation Sites
Source: bioRxiv or medRxiv preprint supplement (doi:10.1101/588574), 2019-03-26

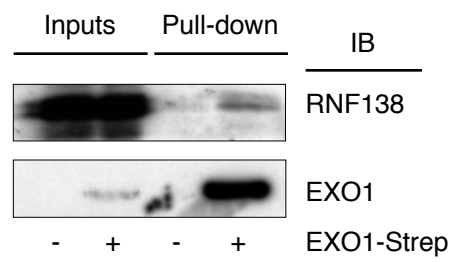

siCTRL

UNTR

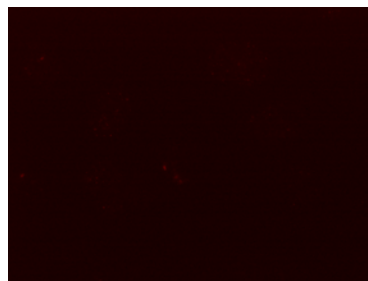

CPT

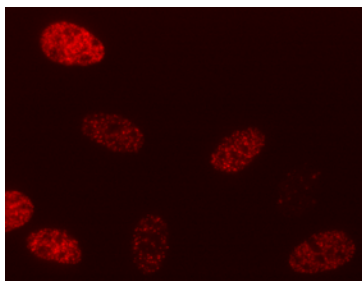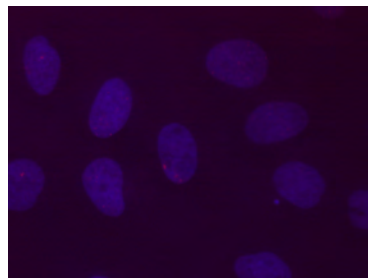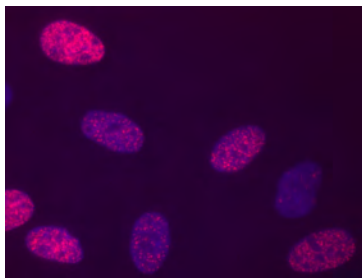

siPDCD11

UNTR

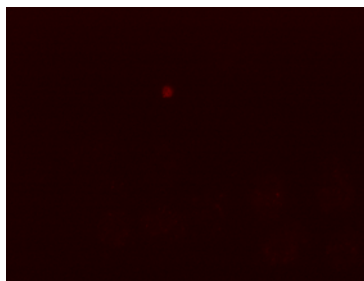

CPT

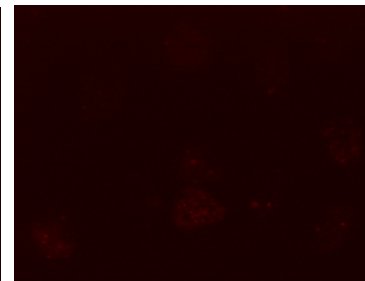 $\gamma$ H2AX $\gamma$ H2AX  
DAPI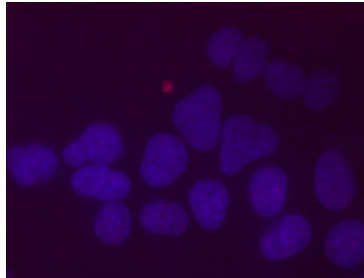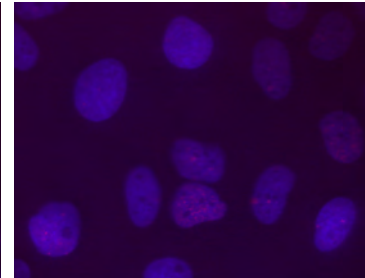

siPHF6

UNTR

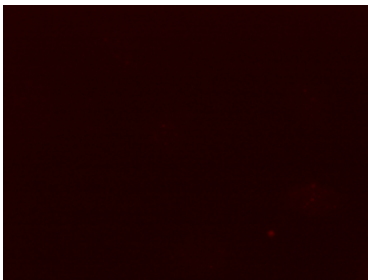

CPT

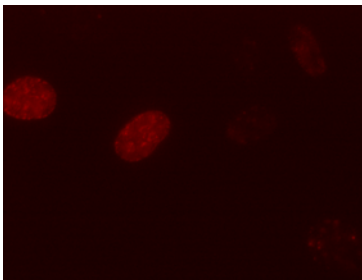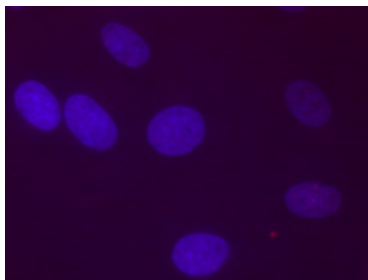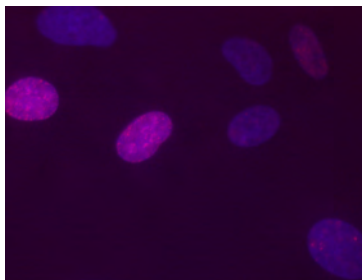

siERH

UNTR

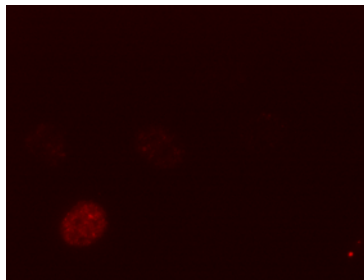

CPT

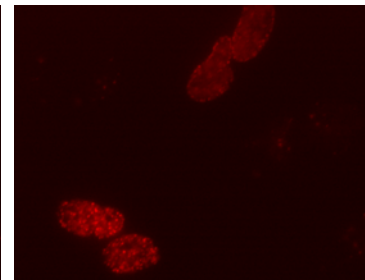 $\gamma$ H2AX $\gamma$ H2AX  
DAPI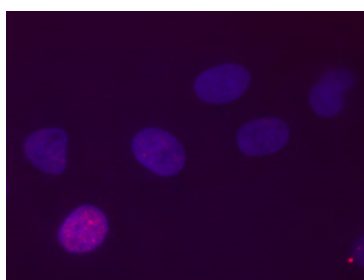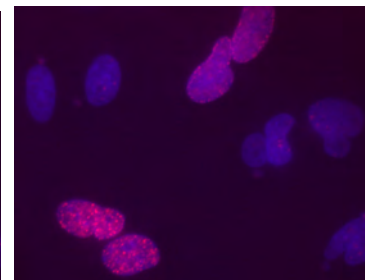

**A**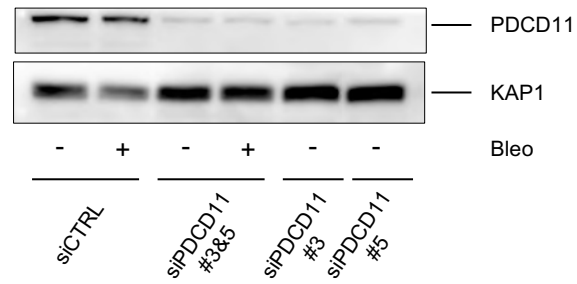**B**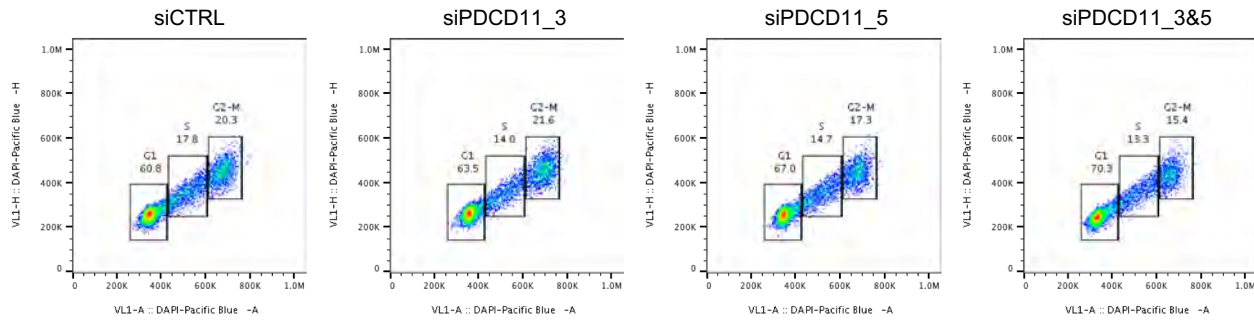**C**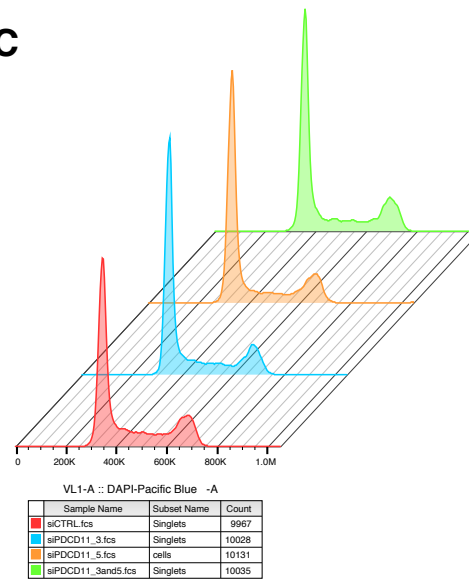

Supplement: Supplementary file [file media-1.pdf]
